# Supplementary material for: Measuring extremes-driven direct biophysical impacts in agricultural drought damages
Source: Copernicus journal article supplement (doi:10.5194/egusphere-2024-2585), 2024-08-29
Supplement: Supplementary file [file egusphere-2024-2585-AC1-supplement.pdf]

Manuscript Number: **egosphere-2024-2585**

**Response to Reviewers**

27 December 2024

**Reviewer comments and authors' replies marked in black**

**Previous manuscript and supplement text marked in brown**

**New manuscript and supplement edits marked in blue**

All page and line numbers refer to the revised, unmarked manuscript

## Response to Reviewer#1

| Reviewer's Comment                                                                                                                                                                                                                                                                                                                                                                                                                                                                                                                                                                                                                                                                                                                                                                                                                                                                                                                                                                                                                                                                                                                                                                                                                                                                                                                                                                                                                                                                                                  | Authors' Response                                                                                                                                                                                                                                                                                                                                                                                                                                                                                                                                                                                                                                                                                                                                                                                                                                                                                                                                                                                                                                                                                                                                                                                                                                                                                                                                                                                                                                                                                                                                                                                                                                                                                                                                                                                                                                                                                                                                                                                                                                                                                                                              |
|---------------------------------------------------------------------------------------------------------------------------------------------------------------------------------------------------------------------------------------------------------------------------------------------------------------------------------------------------------------------------------------------------------------------------------------------------------------------------------------------------------------------------------------------------------------------------------------------------------------------------------------------------------------------------------------------------------------------------------------------------------------------------------------------------------------------------------------------------------------------------------------------------------------------------------------------------------------------------------------------------------------------------------------------------------------------------------------------------------------------------------------------------------------------------------------------------------------------------------------------------------------------------------------------------------------------------------------------------------------------------------------------------------------------------------------------------------------------------------------------------------------------|------------------------------------------------------------------------------------------------------------------------------------------------------------------------------------------------------------------------------------------------------------------------------------------------------------------------------------------------------------------------------------------------------------------------------------------------------------------------------------------------------------------------------------------------------------------------------------------------------------------------------------------------------------------------------------------------------------------------------------------------------------------------------------------------------------------------------------------------------------------------------------------------------------------------------------------------------------------------------------------------------------------------------------------------------------------------------------------------------------------------------------------------------------------------------------------------------------------------------------------------------------------------------------------------------------------------------------------------------------------------------------------------------------------------------------------------------------------------------------------------------------------------------------------------------------------------------------------------------------------------------------------------------------------------------------------------------------------------------------------------------------------------------------------------------------------------------------------------------------------------------------------------------------------------------------------------------------------------------------------------------------------------------------------------------------------------------------------------------------------------------------------------|
| <p>This paper explores the economic impacts of multiple climate extremes, focusing on droughts, by estimating revenue changes. The economic damage is defined as the difference between expected and actual revenues. Using a counterfactual that compares expected revenues to realised revenues under drought conditions, the economic impact of droughts is estimated. The topic is timely and relevant to the journal, but I would like to offer a few suggestions that I believe are important to take on board. One potential concern is the definition of economic impact as the difference between realized and expected revenues. This approach means that a significant portion of the estimated economic impact depends on how expected revenues are defined. You base the <b>counterfactual</b> (expected revenues) on past non-drought revenues within the same region. I am uncertain if this is the best approach, and we might have taken different directions here. To address this, a clear justification for your counterfactual is needed, likely supported by <b>robustness checks</b> to show how results might change with different counterfactuals. Additionally, I would like to discuss (i) your <b>definition of economic impacts</b> and (ii) <b>whether droughts and climate extremes are best measured dichotomously or continuously</b>. These three points form the basis of my general comments. I have also provided a <b>few minor suggestions</b> and textual edits below.</p> | <p>Thank you for appreciating the relevance of our contribution and providing valuable comments on how to improve this manuscript. We have carefully reviewed these comments and have made significant revisions to address them, summarized below:</p> <ul style="list-style-type: none"> <li>• <u>Counterfactual &amp; robustness checks</u>: We have clarified the definition and included robustness checks to show the extent of damage driven by expected revenues as counterfactuals. See our response to <i>general comment G1</i> for further details.</li> <li>• <u>Definition of economic impacts</u>: We clarified that our focus is on assessing direct biophysically-induced damages as part of the broader conceptual framework of economic impacts driven by extremes during droughts. For specific details, please refer below to our response to <i>general comment G2</i>.</li> <li>• <u>Continuous measurement of droughts and extremes</u>: We clarified that the extremes including droughts are measured as continuous variables in statistical yield model. However, drought occurrences are categorized dichotomously (including spatial and temporal development characteristics) to focus damage assessments on affected regions and for counterfactual estimations. Please refer to our response to <i>general comment G3</i> for details.</li> <li>• <u>Aim of study</u>: The study's aim is now explicitly stated in the revised introduction. Please see our response to <i>specific comment S1</i> for the details.</li> <li>• <u>Farm level damage assessment literature</u>: We have added literature on farm-level damage assessment for a more comprehensive introduction. Please see our detailed response to <i>specific comment S2</i> for further details.</li> <li>• <u>Conceptual figure</u>: The color scheme of the conceptual figure has been revised with distinct grayscale tones to ensure that the biophysical and economic processes remain distinguishable when the document is printed in black-&amp;-white. Please refer to updated figure 1 (Pg 4) in the revised manuscript.</li> </ul> |

**General comment**

| S.No. | Reviewer's Comment                                                                                                                                                                                                                                                                                                                                                                                                                                                                                                                                                                                                                                                                                                                                                                                                                                                                                                                                                                                                                                                                                                                                                                                                                                                                                                                  | Authors' Response                                                                                                                                                                                                                                                                                                                                                                                                                                                                                                                                                                                                                                                                                                                                                                                                                                                                                                                                                                                                                                                                                                                                                                                                                                                                                                                                                                                                                                                                                                                                                                                                                                                                                                                                                                                                                                                                                                                                                                                                |
|-------|-------------------------------------------------------------------------------------------------------------------------------------------------------------------------------------------------------------------------------------------------------------------------------------------------------------------------------------------------------------------------------------------------------------------------------------------------------------------------------------------------------------------------------------------------------------------------------------------------------------------------------------------------------------------------------------------------------------------------------------------------------------------------------------------------------------------------------------------------------------------------------------------------------------------------------------------------------------------------------------------------------------------------------------------------------------------------------------------------------------------------------------------------------------------------------------------------------------------------------------------------------------------------------------------------------------------------------------|------------------------------------------------------------------------------------------------------------------------------------------------------------------------------------------------------------------------------------------------------------------------------------------------------------------------------------------------------------------------------------------------------------------------------------------------------------------------------------------------------------------------------------------------------------------------------------------------------------------------------------------------------------------------------------------------------------------------------------------------------------------------------------------------------------------------------------------------------------------------------------------------------------------------------------------------------------------------------------------------------------------------------------------------------------------------------------------------------------------------------------------------------------------------------------------------------------------------------------------------------------------------------------------------------------------------------------------------------------------------------------------------------------------------------------------------------------------------------------------------------------------------------------------------------------------------------------------------------------------------------------------------------------------------------------------------------------------------------------------------------------------------------------------------------------------------------------------------------------------------------------------------------------------------------------------------------------------------------------------------------------------|
| G1.a  | <p>My main suggestion is to reconsider your counterfactual and clarify what it is actually measuring. How do you accurately estimate the expected revenues? What is the counterfactual representing? Defining a reliable counterfactual is critical because the economic impacts in your paper are defined as the difference between observed and expected revenues. Currently, you define expected revenues as the average revenues over the past five non-drought years. However, I am uncertain about whether this counterfactual is consistently measuring the same expectations across regions, especially since no other observable factors are considered. As noted in lines 156-173, the counterfactual seems somewhat arbitrarily defined.</p> <p>For example, consider two regions where neither has experienced a "normal" year during the reference period. Region 1 has had consecutive slightly wet years, while region 2 has had five consecutive slightly dry years (though not extreme). Consequently, your expected revenues for region 1 are based on slightly wet conditions, while for region 2, they reflect slightly dry conditions. As a result, the estimated economic impact of droughts is now being benchmarked against two different baselines, which could affect the accuracy of your estimates.</p> | <p><u>Agreed and enhanced:</u> To clarify the aim of the counterfactual and what it represents, we have modified and added the following text:</p> <p><u>Pg6, lines 195-205:</u> <i>"The counterfactual conditions aim to represent the average non-drought conditions specific to each region. In the context of ongoing climate variability, it is critical that the counterfactual conditions represent the evolving regional climatology (Suarez-Gutierrez et al., 2023) rather than relying on an idealized "normal" year in the traditional sense, which may no longer occur in practice. In this analysis, we define the counterfactual conditions as the average conditions in the preceding five non-drought years. We selected a five-year window following Trenczek et al. (2022), who used it to estimate damages for 2018 and 2019 droughts in Germany. The reason for this number of years is a trade-off: using more years could in theory further enhance the statistical representativeness regarding local climatic conditions, but it risks introducing bias by masking changing market and production conditions, as well as the overall trend in climate change, which also influence local yields and revenues (Lobell et al., 2011).</i></p> <p><i>We determine drought (and non-drought) years based on the soil moisture. In order to do so, we use the Soil Moisture Index (SMI) metric, as explained in Sect. 3.3, and exclude any drought years in the average estimation, an improvement over existing approaches in the literature."</i></p> <p>Additionally, we have clarified our presentation for readers to address the reviewer's related concern about whether the observable factors considered in the counterfactual design are sufficient to reflect spatial differences between regions. To this end, we have modified and added the following text:</p> <p><u>Pg9, lines 284-286:</u> <i>"Using monthly SMI data, at a resolution of 4km x 4km and covering the</i></p> |

| S.No. | Reviewer's Comment                                                                                                                                                                                                                                                                                                                                                                                                                                                                                                                                                                                                                                                                                                                                                                                                                                                                                                                                                                                                                                                                                                                                                                                                                                                                                                                       | Authors' Response                                                                                                                                                                                                                                                                                                                                                                                                                                                                                                                                                                                                                                                                                                                                                                                                                                                                                                                                                                                                                                                                                                                                                                                                                                                                                                                                                                                                                                                                                                 |
|-------|------------------------------------------------------------------------------------------------------------------------------------------------------------------------------------------------------------------------------------------------------------------------------------------------------------------------------------------------------------------------------------------------------------------------------------------------------------------------------------------------------------------------------------------------------------------------------------------------------------------------------------------------------------------------------------------------------------------------------------------------------------------------------------------------------------------------------------------------------------------------------------------------------------------------------------------------------------------------------------------------------------------------------------------------------------------------------------------------------------------------------------------------------------------------------------------------------------------------------------------------------------------------------------------------------------------------------------------|-------------------------------------------------------------------------------------------------------------------------------------------------------------------------------------------------------------------------------------------------------------------------------------------------------------------------------------------------------------------------------------------------------------------------------------------------------------------------------------------------------------------------------------------------------------------------------------------------------------------------------------------------------------------------------------------------------------------------------------------------------------------------------------------------------------------------------------------------------------------------------------------------------------------------------------------------------------------------------------------------------------------------------------------------------------------------------------------------------------------------------------------------------------------------------------------------------------------------------------------------------------------------------------------------------------------------------------------------------------------------------------------------------------------------------------------------------------------------------------------------------------------|
|       |                                                                                                                                                                                                                                                                                                                                                                                                                                                                                                                                                                                                                                                                                                                                                                                                                                                                                                                                                                                                                                                                                                                                                                                                                                                                                                                                          | <p><i>Germany entirely, the monthly average area under drought conditions was estimated (Nagpal et al., 2024) for each district. The drought categorization based on the SMI reflects regional differences in climatic conditions as the SMI is calculated relative to the local historical soil moisture distribution in each district."</i></p>                                                                                                                                                                                                                                                                                                                                                                                                                                                                                                                                                                                                                                                                                                                                                                                                                                                                                                                                                                                                                                                                                                                                                                 |
| G1.b  | <p>Then, a second objective of the paper is to investigate the economic impacts of the interplay of droughts and extreme weather events. I do not yet see how this is reflected in your current counterfactual, as those extreme weather events are not considered when you define your counterfactual. The implications of this are that the expected revenues do not consider any past exposure to other extreme weather events, making me wonder how accurate your economic impact estimates are. One way forward to convince me that your counterfactual is measuring what it intends to measure is to include robustness checks, with different counterfactual definitions (e.g., using shorter or longer reference periods, or incorporating multiple extreme weather events). Alternatively, you could consider defining your counterfactual based on matching or regression-based approaches, which allows you to account for observable characteristics such as the severity of drought (using continuous measures like soil moisture index), crop types, or land area. It would also be useful to indicate how much of the estimated economic impact is driven by the occurrence of droughts versus changes in the expected revenues themselves (i.e. how do your results change when defining different counterfactuals?)</p> | <p><b>Agreed and enhanced:</b> We have added the suggested robustness checks as sensitivity analysis, now detailed in a new results section 4.5 "<i>Sensitivity analysis of estimated biophysically-induced direct damages</i>" [See page 15], of the revised manuscript. The new sensitivity analysis include the following:</p> <ul style="list-style-type: none"> <li>(a) Varying the counterfactual period by <math>\pm</math> 1 year to examine the effect of different reference periods on the estimates.</li> <li>(b) Adjusting the drought classification criteria by testing thresholds with <math>\pm</math> 5% variations in the area of each district with an SMI &lt; 0.2 per month, in addition to the original 20% threshold.</li> </ul> <p>We have also clarified in the manuscript text how our counterfactual address potential bias from exposure to other extreme events, as well as the limitation of our approach.</p> <p><u>Pg7, lines 207-210:</u> "<i>While the counterfactual is designed to exclude drought years, it is possible that some exposure to other extremes could still be reflected in the yields of non-drought years. Any potential yield anomalies in non-drought years, which could lead to over- or under-estimating drought damages, are addressed through the approach of estimating expected revenue based on the five-year average. This helps to smooth out any random yield fluctuations and minimize the influence of non-drought related anomalies."</i></p> |

| S.No. | Reviewer's Comment                                                                                                                                                                                                                                                             | Authors' Response                                                                                                                                                                                                                                                                                                                                                                                                                                                                                                                                                                                                                                                                                                                                                                                                                                                                                                                                                                                                                                                                                                                                                                                                                                                                                                                                                                                                                                                                                                              |
|-------|--------------------------------------------------------------------------------------------------------------------------------------------------------------------------------------------------------------------------------------------------------------------------------|--------------------------------------------------------------------------------------------------------------------------------------------------------------------------------------------------------------------------------------------------------------------------------------------------------------------------------------------------------------------------------------------------------------------------------------------------------------------------------------------------------------------------------------------------------------------------------------------------------------------------------------------------------------------------------------------------------------------------------------------------------------------------------------------------------------------------------------------------------------------------------------------------------------------------------------------------------------------------------------------------------------------------------------------------------------------------------------------------------------------------------------------------------------------------------------------------------------------------------------------------------------------------------------------------------------------------------------------------------------------------------------------------------------------------------------------------------------------------------------------------------------------------------|
|       |                                                                                                                                                                                                                                                                                | <p>Pg 18, lines 506-509: <i>"This yield model, based on anomalies relative to district-level means, also limits our ability to fully control the biophysical impacts of weather extremes in the counterfactual. While a non-extreme weather events counterfactual could have provided valuable insights into the interplay between droughts and other extreme weather events, this was not feasible within the current modelling framework."</i></p>                                                                                                                                                                                                                                                                                                                                                                                                                                                                                                                                                                                                                                                                                                                                                                                                                                                                                                                                                                                                                                                                           |
| G2.   | <p>Are you truly estimating the economic impact of droughts? Your analysis focuses on changes in revenues, but it does not account for changes in costs (e.g. inputs, intermediates etc.). I could live with damage but feel like you are not estimating economic impacts.</p> | <p><u>Agreed and clarified:</u> We agree that our analysis focuses on revenue changes rather than a full economic impact assessment, which would require accounting for costs such as inputs and operations. To address this, we have clarified in the introduction that our focus is on assessing direct biophysically-induced damages as part of the broader conceptual framework of economic impacts.</p> <p>Pg2, lines 66-70: <i>"In this study, we address this bias by presenting a conceptual framework that outlines the biophysical and economic processes through which concurrent or successive weather extremes associated with droughts impact both rainfed and irrigated agriculture (hereafter referred to as extremes-driven impacts). Within this framework, the aim of this study is to measure the direct biophysical damage of extreme hydro-meteorological drivers during droughts (hereafter called direct biophysically-induced damages) and assess their contribution to farm revenue losses."</i></p> <p>Additionally, we have revised the manuscript to consistently communicate that we are estimating direct biophysically-induced damages, rather than attempting a full economic impact assessment.</p> <ol style="list-style-type: none"> <li>a. We have modified the conceptual framework figure to emphasize the specific component of direct biophysically-induced damages as the focus of our measurement and analysis. Please refer to improved figure1 (page 4) in the revised</li> </ol> |

| S.No. | Reviewer's Comment                                                                                                                                                                                                                                                                                                                                                                                                                                                                                                                                                                                                                                                                                                                                 | Authors' Response                                                                                                                                                                                                                                                                                                                                                                                                                                                                                                                                                                                                                                                                                                                                                                                                                                                                                                                                                                                                                                                                                                                                                                                                                                                                                                                                                                                                         |
|-------|----------------------------------------------------------------------------------------------------------------------------------------------------------------------------------------------------------------------------------------------------------------------------------------------------------------------------------------------------------------------------------------------------------------------------------------------------------------------------------------------------------------------------------------------------------------------------------------------------------------------------------------------------------------------------------------------------------------------------------------------------|---------------------------------------------------------------------------------------------------------------------------------------------------------------------------------------------------------------------------------------------------------------------------------------------------------------------------------------------------------------------------------------------------------------------------------------------------------------------------------------------------------------------------------------------------------------------------------------------------------------------------------------------------------------------------------------------------------------------------------------------------------------------------------------------------------------------------------------------------------------------------------------------------------------------------------------------------------------------------------------------------------------------------------------------------------------------------------------------------------------------------------------------------------------------------------------------------------------------------------------------------------------------------------------------------------------------------------------------------------------------------------------------------------------------------|
|       |                                                                                                                                                                                                                                                                                                                                                                                                                                                                                                                                                                                                                                                                                                                                                    | <p>manuscript.</p> <ul style="list-style-type: none"> <li>b. We have now consistently used the term “direct biophysically-induced damages” instead of “economic impacts” to more accurately reflect the scope of our analysis.</li> <li>c. We have ensured that there is always a qualifier clarifying the meaning of the word “impacts” and prevent any misunderstanding as referring to economic impacts.</li> <li>d. We have revised the figure legends in the results section to clarify that they pertain to damages.</li> </ul>                                                                                                                                                                                                                                                                                                                                                                                                                                                                                                                                                                                                                                                                                                                                                                                                                                                                                     |
| G3.   | <p>Are droughts something to be measured dichotomously? Same for the extreme weather events. There seems to be a slight mismatch between the research gap you identify and your approach in practice. For example, in lines 43-45, you describe the research gap as focusing on the variability and intensity of droughts. This suggests a continuous definition, where drought ranges from slightly dry to extremely dry conditions. However, if I understand correctly, in your paper droughts are defined dichotomously—either present or absent. The same issue arises in lines 58-59. Is the research gap you have identified (regarding the variability of droughts and extreme weather) truly being addressed by your current approach?</p> | <p><u>Agreed and clarified:</u> To address the reviewer's concern regarding how our dichotomous drought categorization methodology, essential for defining the counterfactual, accounts for the complexity of drought occurrence including variability and intensity of droughts as described in lines 43–45, we have revised section 3.3 to include the following clarification:</p> <p><u>Pg9, lines 289-295:</u> <i>“This approach accounts for the slow development and spatial and temporal accumulation characteristics of droughts. By using a threshold of <math>SMI &lt; 0.2</math>, we comprehensively capture all regions affected by droughts, including those experiencing varying intensities from severe (<math>SMI &lt; 0.1</math>) to exceptional conditions (<math>SMI &lt; 0.02</math>). This method enables the identification of non-drought years necessary for estimating expected revenues under counterfactual conditions. To evaluate the effect of this drought classification approach on damage estimates, we conducted sensitivity analyses by varying the threshold for the proportion of affected area (<math>\pm 5\%</math>), to confirm the robustness of the damage estimates under alternative drought classification criteria.”</i></p> <p>To address the reviewer's concern regarding the variability and intensity of droughts as described in lines 58-59, it is important to</p> |

| S.No. | Reviewer's Comment | Authors' Response                                                                                                                                                                                                                                                                                                                                                                                                                                                                                                                                                                                                                                                                               |
|-------|--------------------|-------------------------------------------------------------------------------------------------------------------------------------------------------------------------------------------------------------------------------------------------------------------------------------------------------------------------------------------------------------------------------------------------------------------------------------------------------------------------------------------------------------------------------------------------------------------------------------------------------------------------------------------------------------------------------------------------|
|       |                    | <p>clarify that while thresholds are used for categorizing regions as drought (non-drought), the statistical yield model incorporates it, along with other extreme weather events, as continuous variables. This approach accounts for their severity, where higher intensities leads to greater predicted yield reductions. We have revised the manuscript to reflect this clarification.</p> <p><u>Pg 8, lines 257-263:</u> <i>“These indicators are calculated by counting the days in a month that exceed or fall below the defined thresholds.[.....] All features are used as continuous variables to account for stronger effects on crop yields through more intense extremes.”</i></p> |

#### Specific suggestions

| S.No. | Reviewer's Comment                                                                                                                                                                                                                                                                                                                         | Authors' Response                                                                                                                                                                                                                                                                                                                                                                                                                                                                                                                                                                                                                    |
|-------|--------------------------------------------------------------------------------------------------------------------------------------------------------------------------------------------------------------------------------------------------------------------------------------------------------------------------------------------|--------------------------------------------------------------------------------------------------------------------------------------------------------------------------------------------------------------------------------------------------------------------------------------------------------------------------------------------------------------------------------------------------------------------------------------------------------------------------------------------------------------------------------------------------------------------------------------------------------------------------------------|
| S1.   | I have read your introduction but couldn't identify the aim of the paper. I could be wrong here but my feeling is that lines 66-70 intend to do this. It is a little vague and would help me if you make this more concrete. I am looking for a sentence like “The aim of this paper is to....” or “This paper addresses the question....” | <p><u>Agreed and clarified:</u> We have revised the text surrounding lines 66-67 to explicitly clarify the aim of our study for the benefit of the readers.</p> <p><u>Pg2, lines 68-70:</u> <i>“Within this framework, the aim of this study is to measure the direct biophysical damage of extreme hydro-meteorological drivers during droughts (hereafter called direct biophysically-induced damages) and assess their contribution to farm revenue losses.”</i></p>                                                                                                                                                              |
| S2.   | Lines 83-85: Perhaps you could consider adding some studies on farm-level economic damage to be complete. There is a lot of ongoing work here on adaptation literature but also on estimating drought damage on the farm level.                                                                                                            | <p><u>Agreed and enhanced:</u> As suggested, we have incorporated the following text in the introduction of the paper, which discusses the added references on recommended empirical studies analyzing drought damages at the farm level.</p> <p><u>Pg3, lines 83-91:</u> <i>“Alternatively, there are several empirical studies analysing drought damages at the farm level that often incorporate adaptation strategies (van Duinen et al., 2015; Wens et al., 2021), input changes (Prasanna, 2018) and factors affecting localized responses to droughts (Ahmad et al., 2022; Garbero &amp; Muttarak, 2013; Gray et al.,</i></p> |

|     |                                                                                                                                                                                                                                                 |                                                                                                                                                                                                                                                                                                                                                                                                                                                                                                                                               |
|-----|-------------------------------------------------------------------------------------------------------------------------------------------------------------------------------------------------------------------------------------------------|-----------------------------------------------------------------------------------------------------------------------------------------------------------------------------------------------------------------------------------------------------------------------------------------------------------------------------------------------------------------------------------------------------------------------------------------------------------------------------------------------------------------------------------------------|
|     |                                                                                                                                                                                                                                                 | <p>2009). <i>Their empirical findings are tailored to specific context and may not be readily scalable to broader regions. Conversely, national-level assessments, though comprehensive, fail to capture the spatial variability of drought impacts. As droughts can vary greatly across different locations and times (Jaeger et al., 2013; Samaniego et al., 2013), there is a need for consistent, spatially-explicit damage assessments (Meyer et al., 2013) bridging the gap between farm-level-detail and national-level scope.</i></p> |
| S3. | <p>Figure 1: I printed your manuscript in black and white and could not see any colour differences. Consider changing the colours or thinking of some other way to underline what is a biophysical process and what is an economic process.</p> | <p><u>Agreed and modified:</u> Thank you for the suggestion. We have replaced the original color scheme of figure 1 with distinct grayscale tones to ensure that the biophysical and economic processes remain distinguishable when the document is printed in black-and-white. Please refer to improved figure1 (page 4) in the revised manuscript.</p>                                                                                                                                                                                      |

## Response to Reviewer#2

| Reviewer's Comment                                                                                                                                                                                                                                                                                                                                                                                                                                                                                                                                                                                                                                                                                                                                                                                                                                                                                                                                                         | Authors' Response                                                                                                                                                                                                                                                                                                                                                                                                                                                                                                                                                                                                                                                                                                                                                                                                                                                                                                                                                                                                                                                                                                                                                                                                                                                                                                                                                                                                                                                                                                                                                                                                                                                                                                                                                                                                                                                                                                                                                                                                                                             |
|----------------------------------------------------------------------------------------------------------------------------------------------------------------------------------------------------------------------------------------------------------------------------------------------------------------------------------------------------------------------------------------------------------------------------------------------------------------------------------------------------------------------------------------------------------------------------------------------------------------------------------------------------------------------------------------------------------------------------------------------------------------------------------------------------------------------------------------------------------------------------------------------------------------------------------------------------------------------------|---------------------------------------------------------------------------------------------------------------------------------------------------------------------------------------------------------------------------------------------------------------------------------------------------------------------------------------------------------------------------------------------------------------------------------------------------------------------------------------------------------------------------------------------------------------------------------------------------------------------------------------------------------------------------------------------------------------------------------------------------------------------------------------------------------------------------------------------------------------------------------------------------------------------------------------------------------------------------------------------------------------------------------------------------------------------------------------------------------------------------------------------------------------------------------------------------------------------------------------------------------------------------------------------------------------------------------------------------------------------------------------------------------------------------------------------------------------------------------------------------------------------------------------------------------------------------------------------------------------------------------------------------------------------------------------------------------------------------------------------------------------------------------------------------------------------------------------------------------------------------------------------------------------------------------------------------------------------------------------------------------------------------------------------------------------|
| <p>The authors address the complicated question of accurately estimating the direct impacts of droughts on agricultural yields. In doing so, they tackle a number of issues that confound the drought estimates, including the co-occurrence of other extreme weather events, the regional heterogeneity in occurrences and effects that limit the viability of national aggregated measures and the presence of indirect effects that come from secondary and tertiary impacts. Using Germany as the backdrop, they find that the direct impact of droughts amounts to 781 million euros in the period investigated, accounting for 60% of reported yield losses in drought years, going as far as 97% of total damage when the focus is on rice yields in 2018. They also find a discrepancy when comparing national aggregated estimates to regionally estimated losses, suggesting a preference for regional estimates. Some issues remain and are addressed below</p> | <p>Thank you for your appreciation of the significance of our contribution. We found your feedback valuable in further improving our manuscript and have made key revisions to our manuscript to address your comments, as outlined below:</p> <ul style="list-style-type: none"> <li>• <u>Focus of investigation:</u> We explicitly stated the aim of this study in the introduction. For details, please refer to our response to <i>comment 1</i>.</li> <li>• <u>Damage measurement:</u> We clarify the role of statistical yield model and assumption of constant prices in assessing direct biophysically-induced damages of hydro-meteorological extremes during drought years in the manuscript. We also present additional sensitivity analyses to evaluate the potential of over- or underestimation of drought damages. Please refer to our response to <i>comment 2</i> for the details.</li> <li>• <u>Use of current prices in damage assessment:</u> We clarify that the inclusion of prices is essential to our aim of quantifying the direct biophysically-induced damage in monetary terms. The use of current prices reflects conditions contemporaneous to the drought and maintain consistency with previous studies. Please refer to our response to <i>comment 3</i> for more information.</li> <li>• <u>Simulation of yields using regression coefficients:</u> We clarify the use of extreme events features of the LASSO model for simulating yields used in the damage assessment. Details are provided in our response to <i>comment 4</i>.</li> <li>• <u>Spatial disaggregation:</u> We clarify crop-specific assessments as a consistent component of both national-level and regional-level analysis and the discrepancies observed in national estimates arising from spatial-disaggregation. Please see our response to <i>comment 5</i> for further details.</li> <li>• <u>Typos corrected and proofread:</u> We have corrected the typos and thoroughly proofread the text to ensure no additional errors remain.</li> </ul> |

| S.No. | Reviewer's Comment                                                                                                                                                                                                                                                                                                                                                                                                                                                                                                                                                                                                                                                                                                                                                                  | Authors' Response                                                                                                                                                                                                                                                                                                                                                                                                                                                                                                                                                                                                                                                                                                                                                                                                                                                                                                                                                                                                                                                                                                                                                                                                                                                                                                                                                                                                                                                                                                                                                                                                                                                                                                                                   |
|-------|-------------------------------------------------------------------------------------------------------------------------------------------------------------------------------------------------------------------------------------------------------------------------------------------------------------------------------------------------------------------------------------------------------------------------------------------------------------------------------------------------------------------------------------------------------------------------------------------------------------------------------------------------------------------------------------------------------------------------------------------------------------------------------------|-----------------------------------------------------------------------------------------------------------------------------------------------------------------------------------------------------------------------------------------------------------------------------------------------------------------------------------------------------------------------------------------------------------------------------------------------------------------------------------------------------------------------------------------------------------------------------------------------------------------------------------------------------------------------------------------------------------------------------------------------------------------------------------------------------------------------------------------------------------------------------------------------------------------------------------------------------------------------------------------------------------------------------------------------------------------------------------------------------------------------------------------------------------------------------------------------------------------------------------------------------------------------------------------------------------------------------------------------------------------------------------------------------------------------------------------------------------------------------------------------------------------------------------------------------------------------------------------------------------------------------------------------------------------------------------------------------------------------------------------------------|
| 1.    | <p>The first issue I came across while reading was confusion on what exactly was being investigated. For the first few pages, I assumed the purpose was an investigation of the impact of agricultural droughts measured by soil moisture, but after a few pages, the phrase "extreme weather on agriculture during drought years" gave the impression that the investigation was a secondary effect of other extreme weather events during drought years. After reading, I am convinced that the paper is just about the impact of drought (first, with a combination of other extremes investigated in section 4.4), if I am mistaken, it adds to the confusion I had while reading through. Simplifying the text and stating precisely what was investigated would be ideal.</p> | <p><u>Agreed and clarified:</u> To address the confusion regarding the focus of our investigation, we have explicitly stated the aim of the study and clarified it further to eliminate ambiguity, as detailed below.</p> <p><u>Pg 2, lines 66-75:</u> <i>"In this study, we address this bias by presenting a conceptual framework that outlines the biophysical and economic processes through which concurrent or successive weather extremes associated with droughts impact both rainfed and irrigated agriculture (hereafter referred to as extremes-driven impacts). Within this framework, the aim of this study is to measure the direct damage of extreme hydro-meteorological drivers during droughts (hereafter called direct biophysically-induced damages) and assess their contribution to farm revenue losses. These direct biophysically-induced damages include the effects of droughts themselves, as well as additional damage from concurrent or successive weather extremes that exacerbate drought-related effects in regions experiencing drought conditions. To isolate the biophysical impacts of these extremes on crop yields from other influencing factors, we employ crop specific statistical yield models. By comparing the direct biophysically-induced damages estimated from these models with reported farm revenue losses, we can identify the relative contribution of these factors across different regions and crops, which can guide more targeted drought adaptation and enable better decision-making."</i></p> <p>We have also modified the conceptual framework figure (figure1, pg 4) to emphasize the specific component of direct biophysically-induced damages as the focus of our analysis.</p> |
| 2.    | <p>The measure of damage in equation 1 itself may be over or underestimating drought effects in its current form. With the impact being the difference between the expected revenue and the actual revenue, it ascribes this difference in its entirety to drought effects, which may not be entirely true. It is the classic diff-in-diff argument. For the damage equation</p>                                                                                                                                                                                                                                                                                                                                                                                                    | <p><u>Agreed and clarified:</u> Thank you for the insightful comment. In the revised manuscript, we have clarified the role of statistical crop yields and constant price assumption in ascribing the difference between expected and actual revenue to biophysically-induced impacts of extreme weather events including droughts. We have also clarified our approach</p>                                                                                                                                                                                                                                                                                                                                                                                                                                                                                                                                                                                                                                                                                                                                                                                                                                                                                                                                                                                                                                                                                                                                                                                                                                                                                                                                                                         |

| S.No. | Reviewer's Comment                                                                                                                                                                                                                                                                                                                                                                                                                                                                                                                                                                                                                                                                                                                                                                                                                                                 | Authors' Response                                                                                                                                                                                                                                                                                                                                                                                                                                                                                                                                                                                                                                                                                                                                                                                                                                                                                                                                                                                                                                                                                                                                                                                                                                                                                                                                                                                                                                                                                                                                                                                                                                                                                                                                                     |
|-------|--------------------------------------------------------------------------------------------------------------------------------------------------------------------------------------------------------------------------------------------------------------------------------------------------------------------------------------------------------------------------------------------------------------------------------------------------------------------------------------------------------------------------------------------------------------------------------------------------------------------------------------------------------------------------------------------------------------------------------------------------------------------------------------------------------------------------------------------------------------------|-----------------------------------------------------------------------------------------------------------------------------------------------------------------------------------------------------------------------------------------------------------------------------------------------------------------------------------------------------------------------------------------------------------------------------------------------------------------------------------------------------------------------------------------------------------------------------------------------------------------------------------------------------------------------------------------------------------------------------------------------------------------------------------------------------------------------------------------------------------------------------------------------------------------------------------------------------------------------------------------------------------------------------------------------------------------------------------------------------------------------------------------------------------------------------------------------------------------------------------------------------------------------------------------------------------------------------------------------------------------------------------------------------------------------------------------------------------------------------------------------------------------------------------------------------------------------------------------------------------------------------------------------------------------------------------------------------------------------------------------------------------------------|
|       | <p>to be solely due to droughts, the authors current approach would necessitate that in non-drought years, expected outcomes ALWAYS match the realized outcomes. I am doubtful that this is true, and as such, any shortfalls in non-drought years would imply that negative drought effects are overestimated while any windfalls (realized yields greater than expected) would underestimate the drought effects. Therefore, I suggest that the damage be estimated as</p> $D_t = \sum_{c=1}^8 (\bar{R}_{expected,c,t} - R_{actual,c,t}) - \frac{1}{T} \sum_{t=1}^T \sum_{c=1}^8 (\bar{R}_{expected,c,t} - R_{expected,c,t}^{ND})$ <p>Where the additional term is the average difference between expected revenue and realized revenue in T non drought years in the study. This way, any non-drought related discrepancies can be correctly accounted for.</p> | <p>to handling potential yield shortfalls or windfalls through the five-year window for estimating expected revenues in Equation 1, as detailed in the text below. Furthermore, we have tested the sensitivity of our approach by varying the counterfactual period by <math>\pm 1</math> year to assess the risk of over- or underestimating drought effects. The results are detailed in a new subsection 4.5 “<i>Sensitivity analysis of estimated biophysically-induced direct damages</i>” [See pg 15].</p> <p><u>Pg 7, lines 227-231:</u> “<i>We use simulated crop yields to estimate actual revenue for drought years and expected revenue under counterfactual conditions for non-drought years, in order to calculate damages in eq.1. This ensures that the damage estimates are explicitly based on yield variability driven by EWE as described in equation 3, while excluding other factors unrelated to extreme hydro-meteorological drivers. Along with the assumption of constant prices, this methodology ensures that the revenue deviation between expected and actual revenues is attributed solely to the direct biophysically-induced yield impacts during droughts.</i>”</p> <p><u>Pg 7, lines 207-210:</u> “<i>While the counterfactual is designed to exclude drought years, it is possible that some exposure to other extremes could still be reflected in the yields of non-drought years. Any potential yield anomalies in non-drought years, which could lead to over- or under-estimating drought damages, are addressed through the approach of estimating expected revenue based on the five-year average. The helps smooth out any random yield fluctuations and minimize the influence of non-drought related anomalies.</i>”</p> |
| 3.    | <p>In equation 2, using the current price to estimate expected revenue might be problematic given that others have found that extreme weather events have their own distinct impact on prices (Berhanu &amp; Wolde, 2019; Felix &amp; Romuald, 2012; Ray, 202 1). It may be beneficial to use in year prices adjusted</p>                                                                                                                                                                                                                                                                                                                                                                                                                                                                                                                                          | <p><u>Agreed and clarified:</u> To clarify the use of drought-year prices for estimating expected revenues, we have provided the following explanation in the revised manuscript.</p> <p><u>Pg 7, lines 215-222:</u> “<i>The use of drought-year prices to estimate expected revenues reflects contemporaneous market conditions during</i></p>                                                                                                                                                                                                                                                                                                                                                                                                                                                                                                                                                                                                                                                                                                                                                                                                                                                                                                                                                                                                                                                                                                                                                                                                                                                                                                                                                                                                                       |

| S.No. | Reviewer's Comment                                                                                                                                                                                                                                                                                                                                                                                                                                                                                                                        | Authors' Response                                                                                                                                                                                                                                                                                                                                                                                                                                                                                                                                                                                                                                                                                                                                                                                                                                                                                                                                                                                                                                                                                                                                                                                                                                                                                                                                                                                                                |
|-------|-------------------------------------------------------------------------------------------------------------------------------------------------------------------------------------------------------------------------------------------------------------------------------------------------------------------------------------------------------------------------------------------------------------------------------------------------------------------------------------------------------------------------------------------|----------------------------------------------------------------------------------------------------------------------------------------------------------------------------------------------------------------------------------------------------------------------------------------------------------------------------------------------------------------------------------------------------------------------------------------------------------------------------------------------------------------------------------------------------------------------------------------------------------------------------------------------------------------------------------------------------------------------------------------------------------------------------------------------------------------------------------------------------------------------------------------------------------------------------------------------------------------------------------------------------------------------------------------------------------------------------------------------------------------------------------------------------------------------------------------------------------------------------------------------------------------------------------------------------------------------------------------------------------------------------------------------------------------------------------|
|       | <p>for inflation to estimate expected revenues. If the idea was to allow for the focus to be just on yields, then I would recommend just leaving prices out entirely. Including prices would mean that expectations are driven by two sources: expected yields and expected prices, both of which can be separately impacted by domestic and external weather shocks.</p>                                                                                                                                                                 | <p><i>the drought year and maintains consistency with previous studies. While using in-year prices for estimating expected revenues might capture the indirect effects of droughts on prices (Badolo &amp; Somlanare, 2012; Berhanu &amp; Wolde, 2019; C. A. Ray, 2021), it would also incorporate other agricultural market developments unrelated to local droughts or extremes, complicating the attribution of damages to regional extreme hydro-meteorological drivers. Holding prices constant ensures that the damage estimates focus solely on the yield changes induced by extreme hydro-meteorological drivers, providing an economic estimation of biophysically-induced direct damages in monetary terms."</i></p>                                                                                                                                                                                                                                                                                                                                                                                                                                                                                                                                                                                                                                                                                                   |
| 4.    | <p>The statistical crop yield model shows a regression that included several weather extremes on the right-hand side, but did not discuss how the drought contribution to yield was extracted or what it in fact looks like. Some descriptive statistics would be helpful here. Is drought driven yield just <math>\beta \times \text{drought}</math>? Is the dependent variable in subsequent analysis yields as a result of droughts? More exposition on what exactly was done to generate the variable of interest would be ideal.</p> | <p><u>Agreed and clarified:</u> As suggested, we have modified the methodological description of statistical crop yield model in section 3.2 and have added descriptive statistics in a new table-Appendix A (Page 18,19), to make it easier for readers to understand the model outputs without consulting the original publication (Heilemann et al., 2024). We have clarified that the dependent variable is indeed the yield anomaly as a result of droughts (and other extreme events).</p> <p><u>Pg 9, lines 266-272:</u> <i>"Based on the extreme event features, the LASSO models predict the annual yield anomaly (in %) as the dependent variable, representing the deviation of yields from the district-level mean yield for 1999-2022. Details on the standardized coefficients of the crop-specific LASSO models can be found in Table S2 of Heilemann et al. (2024). To simulate crop yields (in deciton per hectare - dt/ha), we multiply the predicted yield anomaly by the district-level mean yield. This approach allows us to isolate crop yields attributable to hydro-meteorological extremes, including droughts, which are subsequently used for damage assessment in drought-affected regions categorised using the SMI, as described in next section. Descriptive statistics for the simulated yields, including their annual mean, minimum, and maximum values, are provided in Appendix A."</i></p> |

| S.No. | Reviewer's Comment                                                                                                                                                                                                                                                                                                                                                                                                                                                                                                                                                                                                                                   | Authors' Response                                                                                                                                                                                                                                                                                                                                                                                                                                                                                                                                                                                                                                                                                                                                                                                                                                                                                                                                                                                                                                                          |
|-------|------------------------------------------------------------------------------------------------------------------------------------------------------------------------------------------------------------------------------------------------------------------------------------------------------------------------------------------------------------------------------------------------------------------------------------------------------------------------------------------------------------------------------------------------------------------------------------------------------------------------------------------------------|----------------------------------------------------------------------------------------------------------------------------------------------------------------------------------------------------------------------------------------------------------------------------------------------------------------------------------------------------------------------------------------------------------------------------------------------------------------------------------------------------------------------------------------------------------------------------------------------------------------------------------------------------------------------------------------------------------------------------------------------------------------------------------------------------------------------------------------------------------------------------------------------------------------------------------------------------------------------------------------------------------------------------------------------------------------------------|
|       |                                                                                                                                                                                                                                                                                                                                                                                                                                                                                                                                                                                                                                                      | We have also updated the citation of the statistical yield model paper (Heilemann et al., 2024) from the pre-print to the published version that reflects the final, peer-reviewed publication.                                                                                                                                                                                                                                                                                                                                                                                                                                                                                                                                                                                                                                                                                                                                                                                                                                                                            |
| 5.    | The study simultaneously addresses two separate issues in its spatial disaggregation exercise. From my reading, the study disaggregates crops, as well as the country and it is not clear which of these is responsible for the differential when compared to national figures. This is especially true as the only differences come when crops are broken out and investigated individually. To summarize, would the national estimate lead to the same discrepancy without spatial disaggregation if the damage of each crop is investigated separately? (Basically, is the difference a result of disaggregating crops or spatial disaggregation) | <u>Agreed and clarified:</u> We appreciate the thoughtful comment and acknowledge that the original text may not have clearly conveyed the distinction between crop-specific and spatial disaggregation in damage estimates. To address this, we have clarified the mechanism leading to the discrepancy between nation level and the disaggregated assessment in the revised manuscript with the text below:<br><u>Pg 11, lines 332-337:</u> <i>"In our analysis, crop-specific damages are calculated both at the national level, using aggregated national data, and at the regional-level, using reported yields from each district. Regional-level damages are then summed to obtain national totals for comparison with aggregated national-level results. This approach allows us to compare the extent of differences in damage estimates between national-level and regional-level data sources while retaining a crop-specific focus in both cases, providing insights into the potential biases that may arise from relying solely on national-level data."</i> |

Some typos...

| S.No. | Reviewer's Comment                                       | Authors' Response                                                                                                                                                                                                       |
|-------|----------------------------------------------------------|-------------------------------------------------------------------------------------------------------------------------------------------------------------------------------------------------------------------------|
| 1.    | Page 2 line 64: underestimates should be underestimate   | <u>Corrected and proofread:</u> Thank you for thoroughly reviewing the manuscript and noting the typos. We have corrected the identified errors and carefully proofread the text to ensure no other such errors remain. |
| 2.    | Page 2 line 77 "...are derived from a the..." delete "a" |                                                                                                                                                                                                                         |
| 3.    | Page 3 line 97 "casual" should be "causal"               |                                                                                                                                                                                                                         |

**Additional references, as suggested by the reviewers, or included to address their feedback:**

Ahmad, M. M., Yaseen, M., & Saqib, S. E. (2022). Climate change impacts of drought on the livelihood of dryland smallholders: Implications of adaptation challenges. *International Journal of Disaster Risk Reduction*, 80, 103210. <https://doi.org/10.1016/j.ijdrr.2022.103210>

Badolo, F., & Somlanare, R. K. (2012). Rainfall shocks, food prices vulnerability and food security: Evidence for Sub-Saharan African Countries. *Proceedings of the African Economic Conference*, Kigali, Rwanda, 1.

Berhanu, M., & Wolde, A. (2019). Review on Climate Change Impacts and its Adaptation strategies on

Food Security in Sub-Saharan Africa. *Agricultural Social Economic Journal*, 19, 145–154.  
<https://doi.org/10.21776/ub.agrise.2019.019.3.3>

Garbero, A., & Muttarak, R. (2013). Impacts of the 2010 Droughts and Floods on Community Welfare in Rural Thailand: Differential Effects of Village Educational Attainment. *Ecology and Society*, 18(4).  
<https://doi.org/10.5751/ES-05871-180427>

Gray, M., Hunter, B., & Edwards, B. (2009). A Sunburnt Country: The Economic and Financial Impact of Drought on Rural and Regional Families in Australia in an Era of Climate Change. *Australian Journal of Labour Economics (AJLE)*, 12, 108–131.

Heilemann, J., Klassert, C., Samaniego, L., Thober, S., Marx, A., Boeing, F., Klauer, B., & Gawel, E. (2024). Projecting impacts of extreme weather events on crop yields using LASSO regression. *Weather and Climate Extremes*, 46, 100738. <https://doi.org/10.1016/j.wace.2024.100738>

Lobell, D. B., Schlenker, W., & Costa-Roberts, J. (2011). Climate Trends and Global Crop Production Since 1980. *Science*, 333(6042), 616–620. <https://doi.org/10.1126/science.1204531>

Prasanna, R. P. I. R. (2018). Economic costs of drought and farmers' adaptation strategies: Evidence from Sri Lanka. *Sri Lanka Journal of Economic Research*, 5(2). <https://doi.org/10.4038/sljer.v5i2.49>

Ray, C. A. (2021). The Impact of Climate Change on Africa's Economies.

Suarez-Gutierrez, L., Müller, W. A., & Marotzke, J. (2023). Extreme heat and drought typical of an end-of-century climate could occur over Europe soon and repeatedly. *Communications Earth & Environment*, 4(1), 1–11. <https://doi.org/10.1038/s43247-023-01075-y>

van Duinen, R., Filatova, T., Geurts, P., & van der Veen, A. (2015). Coping with drought risk: Empirical analysis of farmers' drought adaptation in the south-west Netherlands. *Regional Environmental Change*, 15(6), 1081–1093. <https://doi.org/10.1007/s10113-014-0692-y>

Wens, M. L. K., Mwangi, M. N., van Loon, A. F., & Aerts, J. C. J. H. (2021). Complexities of drought adaptive behaviour: Linking theory to data on smallholder farmer adaptation decisions. *International Journal of Disaster Risk Reduction*, 63, 102435. <https://doi.org/10.1016/j.ijdrr.2021.102435>
